# Supplementary material
Source: PubMed Central journal article supplement (PMC3070210)
Supplement: NIHMS272051-supplement-1_si_001.pdf [file NIHMS272051-supplement-1_si_001.pdf]

**Supporting Information For**

**Predicted structures and dynamics for agonists and antagonists bound to serotonin 5-HT<sub>2B</sub> and 5-HT<sub>2C</sub> receptors**

Soo-Kyung Kim, Youyong Li, Ravinder Abrol, Jiyoung Heo, and William A. Goddard III\*

Beckman Institute/ Mail stop 139-74, Materials and Process Simulation Center, California Institute of Technology, 1200 E. California Blvd., Pasadena, CA 91125

\*Corresponding author:

Prof. William A. Goddard III

Materials and Process Simulation Center (MC 139-74),

California Institute of Technology,

1200 East California Blvd.,

Pasadena, CA 91125, United States

e-mail: [wag@wag.caltech.edu](mailto:wag@wag.caltech.edu)

Tel.: 1-626-395-2731

FAX: 1-626-585-0918

**Table S1.** Predicted transmembrane (TM) region by three methods and hydrophobic centers by two methods. The hydrophobic center by peak method displayed in bold face, while area center was underlined in the sequence.

| TM# | Method   | TM region                                                                       | Seq. | Peak  | Area  |
|-----|----------|---------------------------------------------------------------------------------|------|-------|-------|
| TM1 | Predict1 | L H W A A L L I L M V I <u>I</u> P T I G G <b>N</b> T L V I L A V S L E         | 29   | 13.67 | 13.35 |
|     | Predict2 | N K L H W A A L L I L M V I <u>I</u> P T I G G <b>N</b> T L V I L A V S L E     | 31   | 15.00 | 14.66 |
|     | Predict3 | L H W A A L L I L M V I <u>I</u> P T I G G <b>N</b> T L V I L A V S L E         | 29   | 13.50 | 12.92 |
| TM2 | Predict1 | T N Y F L M S L A V A <b>D</b> L L V G L F <u>V</u> M P I A L L T I M F E A M   | 32   | 13.67 | 19.34 |
|     | Predict2 | T N Y F L M S L A V A <b>D</b> L L V G L F <u>V</u> M P I A L L T I M F E A M   | 32   | 23.50 | 19.89 |
|     | Predict3 | A T N Y F L M S L A V A <b>D</b> L L V G L F <u>V</u> M P I A L L T I M F E A M | 33   | 15.00 | 18.51 |
| TM3 | Predict1 | P A W L F L <b>D</b> <u>V</u> L F S T A S I M H L C A I S V D                   | 24   | 11.33 | 9.35  |
|     | Predict2 | L C P A W L F L <b>D</b> <u>V</u> L F S T A S I M H L C A I                     | 23   | 13.50 | 9.85  |
|     | Predict3 | C P A W L F L <b>D</b> <u>V</u> L F S T A S I M H L C A I S V D                 | 25   | 12.50 | 11.77 |
| TM4 | Predict1 | T A F I K I T V V <b>W</b> L <u>I</u> S I G I A I P V P I K G                   | 24   | 12.67 | 12.49 |
|     | Predict2 | A F I K I T V V <b>W</b> L <u>I</u> S I G I A I P V P I K G                     | 23   | 13.00 | 11.83 |
|     | Predict3 | A F I K I T V V <b>W</b> L <u>I</u> S I G I A I P V P I K G I                   | 24   | 12.83 | 12.32 |
| TM5 | Predict1 | F G D F M L F G S L A A F F T <b>P</b> <u>L</u> A I M I V T Y F L T I H         | 29   | 14.67 | 16.07 |
|     | Predict2 | M L F G S L A A F F T <b>P</b> <u>L</u> A I M I V T Y F L T I H                 | 25   | 11.50 | 12.53 |
|     | Predict3 | F M L F G S L A A F F T <b>P</b> <u>L</u> A I M I V T Y F L T I H               | 26   | 11.00 | 12.79 |
| TM6 | Predict1 | L G I V F F L F L L M <b>W</b> <u>C</u> <b>P</b> F F I T N I T L V L C D        | 26   | 12.33 | 12.94 |
|     | Predict2 | L G I V F F L F L L M <b>W</b> <u>C</u> <b>P</b> F F I T N I T L V L C D        | 25   | 14.00 | 12.60 |
|     | Predict3 | G I V F F L F L L M <b>W</b> <u>C</u> <b>P</b> F F I T N I T L V L C D          | 25   | 11.00 | 12.06 |
| TM7 | Predict1 | Q M L L E I F V W I G <b>Y</b> <u>V</u> S S G V N <b>P</b> L V Y T L F N K      | 27   | 14.67 | 12.69 |
|     | Predict2 | Q M L L E I F V W I G <b>Y</b> <u>V</u> S S G V N <b>P</b> L V Y T L F N K      | 27   | 15.00 | 12.46 |
|     | Predict3 | Q M L L E I F V W I G <b>Y</b> <u>V</u> S S G V N <b>P</b> L V Y T L F N K      | 27   | 14.50 | 12.15 |

**Table S2.** The experiment binding affinity and predicted scoring energy (kcal/mol) of several 5-HT2B agonists at the human 5-HT2B receptor

| <b>Charge</b>   |            |                   |                   |              |
|-----------------|------------|-------------------|-------------------|--------------|
| <b>Compound</b> | <b>Pki</b> | <b>UnifiedCav</b> | <b>PartialSol</b> | <b>Total</b> |
| SNF             | 7.76       | -70.87            | -18.70            | 24.72        |
| DesMeNF         | 7.26       | -70.76            | -14.04            | 58.60        |
| RNF             | 7.21       | -69.26            | -13.78            | 26.51        |
| EthylNF         | 6.11       | -64.69            | -12.58            | 36.16        |

| <b>Neutral</b>  |            |                   |                   |              |
|-----------------|------------|-------------------|-------------------|--------------|
| <b>Compound</b> | <b>Pki</b> | <b>UnifiedCav</b> | <b>PartialSol</b> | <b>Total</b> |
| SNF             | 7.76       | -25.87            | -21.88            | -31.26       |
| RNF             | 7.21       | -25.55            | -18.50            | -31.14       |
| DesMeNF         | 7.26       | -25.42            | -18.13            | -5.18        |
| EthylNF         | 6.11       | -22.95            | -18.97            | -20.09       |

- UnifiedCav: unified cavity E, PartialSol: partial solvation E, Total: Total E

**Table S3.** The 10 most stable 7-helix conformations for the human 5-HT2B receptor from the BiHelix analysis. Here the reference angle of zero = [0, 0, 0, 0, 0, 0, 0] in bold face is final MembEnsemb conformations, which corresponds to {-60, -60, 0, 60, -60, 60, 0} referenced to the frog rhodopsin template. InterHB is the sum of hydrogen bond energies between various helices. BiHelE (S3) is the sum of the helix-pairwise interaction energies from the BiHelix analysis.

| #        | <b>H1</b> | <b>H2</b> | <b>H3</b> | <b>H4</b> | <b>H5</b> | <b>H6</b> | <b>H7</b> | InterHB      | BiHelE       |
|----------|-----------|-----------|-----------|-----------|-----------|-----------|-----------|--------------|--------------|
| 1        | 0         | 0         | 0         | 330       | 0         | 0         | 0         | -59.1        | 245.5        |
| <b>2</b> | <b>0</b>  | <b>-54.2</b> | <b>249.7</b> |
| 3        | 0         | 0         | 0         | 330       | 0         | 60        | 90        | -69.3        | 262.7        |
| 4        | 0         | 0         | 0         | 0         | 0         | 60        | 90        | -64.4        | 267.0        |
| 5        | 0         | 0         | 0         | 330       | 0         | 90        | 120       | -64.4        | 273.0        |
| 6        | 0         | 0         | 0         | 0         | 0         | 90        | 120       | -59.5        | 277.2        |
| 7        | 0         | 0         | 0         | 330       | 0         | 60        | 120       | -58.7        | 286.4        |
| 8        | 0         | 0         | 0         | 330       | 0         | 30        | 120       | -41.9        | 288.4        |
| 9        | 0         | 0         | 0         | 0         | 0         | 60        | 120       | -53.8        | 290.6        |
| 10       | 0         | 0         | 0         | 0         | 0         | 30        | 120       | -37.0        | 292.7        |

**Table S4.** Cavity analysis of SB-206533 **1** and **2** at human 5-HT2B and 2C receptors. The residues was ordered by the non-bonding energy difference (2C -2B).

| <b>2 (pKi, 2B: 7.3)</b> |                | <b>2 (pKi, 2C: 5.4)</b> |                | <b>Diff.<br/>2C-2B</b> | <b>1 (2B: 7.6)</b> | <b>1 (2C: 7.9)</b> |
|-------------------------|----------------|-------------------------|----------------|------------------------|--------------------|--------------------|
| <b>Res #</b>            | <b>NonBond</b> | <b>Res #</b>            | <b>NonBond</b> |                        | <b>NonBond</b>     | <b>NonBond</b>     |
| <b>SUM</b>              | <b>-47.53</b>  | <b>SUM</b>              | <b>-36.06</b>  | <b>11.47</b>           | <b>-42.48</b>      | <b>-42.28</b>      |
| <b>LEU 132</b>          | <b>-2.35</b>   | <b>ILE 132</b>          | <b>6.12</b>    | <b>8.46</b>            | <b>-2.48</b>       | <b>-0.84</b>       |
| ASN 278                 | -2.40          | ASN 276                 | -1.54          | 0.86                   | -2.19              | -0.47              |
| PHE 226                 | -2.05          | PHE 224                 | -1.38          | 0.68                   | -1.02              | -2.39              |
| THR 277                 | -1.33          | THR 275                 | -0.66          | 0.67                   | -1.17              |                    |
| VAL 136                 | -5.34          | VAL 136                 | -4.91          | 0.43                   | -3.78              | -5.44              |
| ALA 225                 | -1.09          | ALA 223                 | -0.68          | 0.41                   | -0.48              | -1.12              |
| MET 270                 | -0.40          |                         |                | 0.40                   | -0.06              |                    |
| PHE 275                 | -0.38          |                         |                | 0.38                   |                    |                    |
| LEU 137                 | -0.38          |                         |                | 0.38                   |                    |                    |
| <b>LEU 281</b>          | <b>-0.56</b>   | <b>SER 279</b>          | <b>-0.23</b>   | <b>0.33</b>            | <b>-0.67</b>       | <b>0.00</b>        |
| <b>MET 218</b>          | <b>-0.32</b>   | <b>VAL 216</b>          |                | <b>0.32</b>            | <b>-0.35</b>       | <b>-0.28</b>       |
| LEU 219                 | -0.28          |                         |                | 0.28                   | -0.27              |                    |
| <b>LEU 223</b>          | <b>-0.26</b>   | <b>PHE 221</b>          |                | <b>0.26</b>            | <b>-0.20</b>       | <b>-0.30</b>       |
| ILE 143                 | -0.51          | ILE 143                 | -0.26          | 0.25                   | -0.28              | -0.31              |
| SER 222                 | -1.70          | SER 220                 | -1.49          | 0.21                   | -2.03              | -2.92              |
| PHE 267                 | -0.59          | PHE 265                 | -0.42          | 0.17                   | -0.52              | -0.09              |
| ILE 276                 | -0.16          | ILE 274                 |                | 0.16                   |                    | -0.10              |
| SER 306                 | -0.15          |                         |                | 0.15                   |                    |                    |
| ILE 302                 | -0.12          |                         |                | 0.12                   | -0.10              |                    |
| <b>PHE 220</b>          | <b>-0.07</b>   | <b>ILE 218</b>          | <b>0.00</b>    | <b>0.07</b>            | <b>0.00</b>        | <b>-0.08</b>       |
| <i>SER 139</i>          | <i>-6.34</i>   | <i>SER 139</i>          | <i>-6.28</i>   | <i>0.06</i>            | <i>-5.67</i>       | <i>-6.95</i>       |
| <b>ALA 224</b>          | <b>-0.05</b>   | <b>VAL 222</b>          |                | <b>0.05</b>            | <b>0.00</b>        | <b>-0.14</b>       |
| CYS 272                 | -0.03          |                         |                | 0.03                   | -0.03              |                    |
| <b>LEU 269</b>          | <b>-0.03</b>   | <b>ILE 267</b>          | <b>0.00</b>    | <b>0.03</b>            | <b>-0.03</b>       | <b>0.00</b>        |
| PHE 274                 | -5.95          | PHE 272                 | -5.93          | 0.02                   | -4.43              | -5.80              |
| <b>LYS 211</b>          | <b>-0.01</b>   |                         |                | <b>0.01</b>            | <b>-0.06</b>       |                    |
| <b>ILE 298</b>          | <b>0.00</b>    |                         |                | <b>0.00</b>            | <b>-0.02</b>       |                    |
| TRP 131                 | -0.32          | TRP 131                 | -0.32          | <b>0.00</b>            | -0.37              | -0.44              |
| <b>ILE 186</b>          | <b>0.00</b>    | <b>VAL 186</b>          | <b>0.00</b>    | <b>0.00</b>            | <b>-0.10</b>       | <b>-1.27</b>       |
| <b>ALA 187</b>          | <b>0.00</b>    | <b>SER 187</b>          | <b>0.00</b>    | <b>0.00</b>            | <b>-0.12</b>       | <b>-0.58</b>       |
| ASP 216                 |                |                         |                |                        | -0.38              |                    |
| SER 307                 | -0.85          | SER 306                 | -0.86          | 0.00                   | -0.77              |                    |
| <b>MET 294</b>          | <b>0.01</b>    |                         |                | <b>-0.01</b>           |                    |                    |
| VAL 107                 | -0.08          | VAL 107                 | -0.10          | -0.02                  | -0.10              |                    |
| LEU 295                 | -0.23          | LEU 294                 | -0.26          | -0.03                  | -0.26              |                    |
| PHE 265                 | 0.05           |                         |                | -0.05                  |                    |                    |

|            |            |              |            |            |              |              |              |              |
|------------|------------|--------------|------------|------------|--------------|--------------|--------------|--------------|
| PHE        | 138        | -0.70        | PHE        | 138        | -0.76        | -0.06        | -0.63        |              |
| TYR        | 304        | -1.59        | TYR        | 303        | -1.65        | -0.06        | -1.35        | -0.53        |
| THR        | 140        | -1.16        | THR        | 140        | -1.32        | -0.17        | -0.96        | -2.12        |
| <b>VAL</b> | <b>190</b> | <b>-0.51</b> | <b>ILE</b> | <b>190</b> | <b>-0.72</b> | <b>-0.20</b> | <b>-0.76</b> | <b>-1.24</b> |
| GLY        | 303        | -0.87        | GLY        | 302        | -1.10        | -0.23        | -0.73        | -0.31        |
| TRP        | 271        | -0.84        | TRP        | 269        | -1.14        | -0.30        | -1.42        | -1.77        |
| VAL        | 300        | -1.72        | VAL        | 299        | -2.19        | -0.48        | -1.83        | -0.09        |
| LEU        | 296        | -1.05        | LEU        | 295        | -1.59        | -0.54        | -1.21        | -0.69        |
| ASP        | 135        | -2.87        | ASP        | 135        | -3.63        | -0.75        | -3.81        | -3.50        |
| PHE        | 299        | -1.95        | PHE        | 298        | -2.76        | -0.82        | -1.87        | -1.54        |
|            |            |              | GLY        | 219        |              |              |              | -0.68        |
|            |            |              | PRO        | 191        |              |              |              | -0.07        |
|            |            |              | PRO        | 271        |              |              |              | -0.11        |
|            |            |              | VAL        | 304        |              |              |              | -0.06        |
|            |            |              | LEU        | 278        |              |              |              | -0.05        |
|            |            |              | ASN        | 296        |              |              |              | -0.04        |
|            |            |              | TRP        | 300        |              |              |              | -0.03        |
|            |            |              | ILE        | 226        |              |              |              | 0.01         |

---

**Table S5.** Cavity analysis of PRX-08066 **3**, at the human 5-HT2B and 2C receptors. The residues was ordered by the nonbonding energy difference (2C – 2B).

| <b>3 (FLIPR: 3.2 nM, Ki, 5HT2B: 30 nM )</b> |            |                | <b>3 (HT2C FLIPR selectivity: &gt; 3,200 )</b> |            |                | <b>Diff. 2C-2B</b> |
|---------------------------------------------|------------|----------------|------------------------------------------------|------------|----------------|--------------------|
| <b>Res</b>                                  | <b>#</b>   | <b>NonBond</b> | <b>Res</b>                                     | <b>#</b>   | <b>NonBond</b> |                    |
| <b>SUM</b>                                  |            | <b>-42.25</b>  | <b>SUM</b>                                     |            | <b>-17.98</b>  | <b>20.44</b>       |
| PHE                                         | 365        | -1.12          | PHE                                            | 353        | 3.44           | 4.56               |
| VAL                                         | 366        | -1.68          | VAL                                            | 354        | 2.71           | 4.39               |
| PHE                                         | 138        | -0.53          | PHE                                            | 137        | 3.21           | 3.75               |
| TYR                                         | 370        | -2.10          | TYR                                            | 358        | 1.04           | 3.14               |
| PHE                                         | 340        | -3.90          | PHE                                            | 327        | -2.33          | 1.57               |
| THR                                         | 343        | -1.41          | THR                                            | 330        | 0.15           | 1.56               |
| <b>LEU</b>                                  | <b>132</b> | <b>-3.76</b>   | <b>ILE</b>                                     | <b>131</b> | <b>-2.43</b>   | <b>1.33</b>        |
| <b>LEU</b>                                  | <b>347</b> | <b>-2.49</b>   | <b>SER</b>                                     | <b>334</b> | <b>-1.60</b>   | <b>0.90</b>        |
| <b>VAL</b>                                  | <b>190</b> | <b>-0.20</b>   | <b>ILE</b>                                     | <b>189</b> | <b>0.42</b>    | <b>0.62</b>        |
| <b>VAL</b>                                  | <b>103</b> | <b>-0.80</b>   | <b>VAL</b>                                     | <b>102</b> | <b>-0.24</b>   | <b>0.56</b>        |
| TRP                                         | 131        | -1.23          | TRP                                            | 130        | -0.74          | 0.49               |
| SER                                         | 373        | 0.21           | SER                                            | 361        | 0.57           | 0.36               |
| LEU                                         | 362        | -1.88          | LEU                                            | 350        | -1.55          | 0.33               |
| SER                                         | 139        | -2.74          | SER                                            | 138        | -2.60          | 0.14               |
| TRP                                         | 337        | -0.73          | TRP                                            | 324        | -0.60          | 0.13               |
| VAL                                         | 107        | -0.50          | VAL                                            | 106        | -0.39          | 0.11               |
| VAL                                         | 348        | -0.41          | VAL                                            | 335        | -0.34          | 0.07               |
| PHE                                         | 333        | -0.78          | PHE                                            | 320        | -0.74          | 0.04               |
| SER                                         | 142        | -0.07          | SER                                            | 141        | -0.12          | -0.04              |
| SER                                         | 222        | -0.83          | SER                                            | 219        | -0.88          | -0.04              |
| <b>MET</b>                                  | <b>218</b> | <b>-0.50</b>   | <b>VAL</b>                                     | <b>215</b> | <b>-0.57</b>   | <b>-0.07</b>       |
| <i>APP</i>                                  | <i>135</i> | <i>-7.52</i>   | <i>APP</i>                                     | <i>134</i> | <i>-7.70</i>   | <i>-0.19</i>       |
| VAL                                         | 136        | 0.70           | VAL                                            | 135        | 0.45           | -0.25              |
|                                             |            |                | MET                                            | 107        | -0.31          | -0.31              |
|                                             |            |                | VAL                                            | 208        | -0.47          | -0.47              |
| <b>THR</b>                                  | <b>210</b> | <b>-0.32</b>   | <b>ASN</b>                                     | <b>210</b> | <b>-0.97</b>   | <b>-0.65</b>       |
| ASN                                         | 344        | -2.67          | ASN                                            | 331        | -3.44          | -0.77              |
| LEU                                         | 361        | -1.16          | LEU                                            | 349        | -1.95          | -0.78              |
| <b>LYN</b>                                  | <b>211</b> | <b>-2.56</b>   |                                                |            |                |                    |
| PRO                                         | 191        | -0.57          |                                                |            |                |                    |
| <b>GLP</b>                                  | <b>212</b> | <b>-0.30</b>   |                                                |            |                |                    |
| MET                                         | 336        | -0.23          |                                                |            |                |                    |
| <b>SER</b>                                  | <b>372</b> | <b>-0.17</b>   |                                                |            |                |                    |

- The residues in the same line for 5-HT2B and 2C receptor have the same Ballestreros numbers .
- The residues that are variable between 2B and 2C are displayed in bold face.

**Table S6.** The ensemble docking results of the human 5-HT2B receptor for agonist, HT and antagonist, SB1, in charged and neutral system

**Charge system**

**HT**

| Rank | TM rotation            | UnifiedCav    | FullSol       | PartialSol    | LocalCav      | Total         | Interaction   | ProteinE      |
|------|------------------------|---------------|---------------|---------------|---------------|---------------|---------------|---------------|
| 1    | 0, 0, 0, 0, 0, 0, 0    | <b>-53.54</b> | -5.50         | -33.07        | -53.24        | <b>-45.86</b> | -12.69        | <b>-33.17</b> |
| 5    | 0, 0, 0, 0, 0, 0, -30  | -52.58        | -11.11        | <b>-34.14</b> | -53.02        | -23.45        | <b>-20.97</b> | -2.48         |
| 2    | 0, 0, 0, -30, 0, 0, 0  | -53.26        | <b>-13.27</b> | -33.00        | <b>-53.59</b> | 6.88          | -12.40        | 19.28         |
| 4    | 0, 0, 0, 0, 0, 30, -30 | -44.59        | -6.63         | -24.29        | -43.46        | 24.25         | -9.11         | 33.36         |
| 3    | 0, 0, 0, 0, 0, 30, 0   | -44.46        | -3.06         | -22.67        | -43.40        | 59.44         | -7.67         | 67.11         |

**SB1**

| Rank | TM rotation            | UnifiedCav    | FullSol       | PartialSol    | LocalCav      | Total         | Interaction | ProteinE      |
|------|------------------------|---------------|---------------|---------------|---------------|---------------|-------------|---------------|
| 5    | 0, 0, 0, 0, 0, 0, -30  | -35.70        | -33.63        | -51.31        | -34.89        | <b>112.27</b> | 2.53        | <b>109.75</b> |
| 1    | 0, 0, 0, 0, 0, 0, 0    | -40.80        | -43.25        | -50.79        | -39.66        | 114.87        | 4.30        | 110.57        |
| 4    | 0, 0, 0, 0, 0, 30, -30 | -39.61        | -32.05        | -50.55        | -37.59        | 148.64        | 5.16        | 143.48        |
| 2    | 0, 0, 0, -30, 0, 0, 0  | <b>-44.45</b> | <b>-46.70</b> | <b>-52.74</b> | <b>-43.83</b> | 176.82        | <b>1.43</b> | 175.39        |
| 3    | 0, 0, 0, 0, 0, 30, 0   | -36.08        | -23.84        | -43.65        | -35.18        | 220.11        | 9.75        | 210.36        |

**Neutral system**

**HT**

| Rank | TM rotation            | UnifiedCav    | FullSol      | PartialSol   | LocalCav      | Total         | Interaction | ProteinE      |
|------|------------------------|---------------|--------------|--------------|---------------|---------------|-------------|---------------|
| 1    | 0, 0, 0, 0, 0, 0, 0    | -7.21         | 84.69        | 93.85        | -7.35         | <b>-67.32</b> | 4.24        | <b>-71.57</b> |
| 5    | 0, 0, 0, 0, 0, 0, -30  | -2.12         | 104.71       | 118.87       | -2.74         | -25.27        | 10.98       | -36.25        |
| 2    | 0, 0, 0, -30, 0, 0, 0  | -10.66        | <b>79.27</b> | <b>89.91</b> | -10.14        | -15.57        | <b>0.54</b> | -16.12        |
| 3    | 0, 0, 0, 0, 0, 30, 0   | -11.39        | 109.72       | 115.67       | -11.32        | 16.63         | 12.38       | 4.25          |
| 4    | 0, 0, 0, 0, 0, 30, -30 | <b>-17.92</b> | 99.51        | 105.48       | <b>-18.24</b> | 11.49         | 5.68        | 5.81          |

**SB1**

| Rank | TM rotation            | UnifiedCav    | FullSol       | PartialSol    | LocalCav      | Total        | Interaction | ProteinE     |
|------|------------------------|---------------|---------------|---------------|---------------|--------------|-------------|--------------|
| 5    | 0, 0, 0, 0, 0, 0, -30  | -35.78        | -41.99        | -48.60        | -34.80        | <b>49.99</b> | 5.13        | <b>44.86</b> |
| 1    | 0, 0, 0, 0, 0, 0, 0    | -40.90        | -47.29        | -48.54        | -39.85        | 54.66        | 6.42        | 48.24        |
| 4    | 0, 0, 0, 0, 0, 30, -30 | -39.11        | -40.44        | -47.05        | -37.11        | 76.63        | 8.17        | 68.45        |
| 2    | 0, 0, 0, -30, 0, 0, 0  | <b>-44.25</b> | <b>-48.96</b> | <b>-50.28</b> | <b>-43.71</b> | 120.75       | <b>3.74</b> | 117.01       |
| 3    | 0, 0, 0, 0, 0, 30, 0   | -37.05        | -37.10        | -42.97        | -36.23        | 126.73       | 10.32       | 116.41       |

- Rank number is from CombiHelix result.
- Final complexes were ordered by total energy (kcal/mol).
- UnifiedCav: unified cavity E, PartialSol: partial solvation E, Total: Total E



```

P28223|5HT2A MDILCEENTSLSSTTNSLMQLNDDTRLYSNDFNSSGEANTSDAFNWTVDSENRTNLSCEGC 60
P41595|5HT2B -MALSYRVSELQSTIPEHILQSTFVHVIS-----SNWSGLQTESIPEEMKQIVVEEQG- 51
P28335|5HT2C MVNLRNAVHSFLVHLIGLLVWQCDISVSP-----VAAIVTDIFN-TSDG-GRFKFPDG-- 51
      *      :      :      :      :      :      :      :      :      :
P28223|5HT2A LSPSCLSLHLQEKNSALLTAVVVIILTIAGNINILVIMAVSLEKKLQNAATNYFLMSLAIAID 120
P41595|5HT2B ---LKLHWALLTLMVVIPTIGGNTLVILAVSLEKKLQYATNYFLMSLAIAVD 100
P28335|5HT2C -----VQNWALSIVIIIMIGGNILVIMAVSMEKKLHNATNYFLMSLAIAID 99
      :      *      *      *      *      *      *      *      *      *
P28223|5HT2A MLLGFLVMPVSMILTILYGRWPLPSKLCVAVWIYLDVLFSTASIMHLCAISLDRYVAIQNP 180
P41595|5HT2B LLVGLFVMPIALLTIMFEAMWPLPLVLCVPAWIFLDVLFSTASIMHLCAISVDRYIAIKKP 160
P28335|5HT2C MLVGLLVMPPLSLLAILYDVVWPLPRYLCPVWISLDVLFSTASIMHLCAISLDRYVAIRNP 159
      :      *      *      *      *      *      *      *      *      *
P28223|5HT2A IHHSRFRNSRTRKAFKIIAVTISVGSMPFVPGIQQDDSKVFKE-GSLLADD--NFVL 236
P41595|5HT2B IQANQYNSRATAFIKITVVVLIISIGIAPVPIKGIETDVDNPNN-ITCVLTKERFGDFML 219
P28335|5HT2C IEHSRFRNSRTRKAIMKIAIVAISIGVSVPIVIGLRDEEKVVFVNNTTQVLDNDP--NFVL 216
      *      *      *      *      *      *      *      *      *
P28223|5HT2A IGSFVSFFIPLTIMVITYFLTIKSLQKEATLCVSDLGTRAKLASFSFLP----- 285
P41595|5HT2B FGSLLAAFFIPLLAIMIVTYFLTIHALQKKAYLVKKNKPPQRLTWLTVSTVFQRDETPCSSPE 279
P28335|5HT2C IGSFVAFFIPLTIMVITYCLTIYVLRQALMLLHGHTEEPGLSLDFLKCKKRNTAE--- 273
      :      *      *      *      *      *      *      *      *      *
P28223|5HT2A -----QSSLSEKLFQRSIHREP GSYTGRRTMQSISNEQKACKV LGIVFFFLFVVMWC 337
P41595|5HT2B KVAMLDGSRKDKALPNSGDETLMRRTSTIGKKSQTISNEQRASKV LGIVFFFLFLLMWC 338
P28335|5HT2C -----EENSANPNQDQNAARRRKKKERRPRGTMQAINNERKASKV LGIVFFVFLIMWC 325
      :      :      :      :      :      :      :      *      *
P28223|5HT2A PFFITNIMAVICKESCNEDEVIGALINVFVWIGYLSAVNPLVXTL FNKTYRSAFSRYIQ 397
P41595|5HT2B PFFITNITLVLCDS-CNQTTLQMLTEIFVWIGYVSSGVNPLVYTL FNKTFRDAFGRYITC 397
P28335|5HT2C PFFITNILSVLCEKSCNQKLMEKLLINVFVWIGYVCSGINPLVYTL FNKIYRRAFSNYLRC 385
      *      *      *      *      *      *      *      *      *
P28223|5HT2A QYKENKKP-LQLILVNTIPALAYKSSQLQMGQKK-----NSKQDAKTTDNDCSM 445
P41595|5HT2B NYRATKSVKTLRKRSSKIYFRNPMAENSKFFKKHGIRNGINPAMYQSPMRLRSSTIQSS 457
P28335|5HT2C NYKVEKKPPVRQIPRVAATALS GRELVNVIYRHT-----NEPVIEKASDNEPGI 434
      :      *      :      :      :      :      :      :      :      :
P28223|5HT2A VALGKQHSEEAASKDNSDGVNEKVS CV 471
P41595|5HT2B IIL--LDTLLLTENEGDKTEEQVSYV 481
P28335|5HT2C EMQ--VENLELPVNPSSVVSERISSV 458
      :      :      :      :      *      *

```

**Fig. S1.** TMPredict multiple alignments of three 5-HT2 receptors, 2A, 2B and 2C. The transmembrane (TM) helix predicted by TMPredict program are shown in different colors (TM1 in purple, TM2 in blue, TM3 in cyan, TM4 in green, TM5 in yellow, TM6 in orange, TM7 in red). Highly conserved residues in Family A receptors (N1.50, S2.45, D2.50, C3.25, D3.49, R3.50, Y3.51, W4.50, P5.50, P6.50, N7.49, P7.50, and Y7.53) are displayed in box. The residues in white are important amino acids from cavity analysis of the bound ligands. The % sequence identities are 38% for 2A:2B, 48% for 2A:2C, and 39% for 2B:2C.

SS = Alpha-helix (H) Beta-Sheet (E) Secondary Structure  
 TM = Transmembrane (X), Loop: '+'=outside, '-'=inside

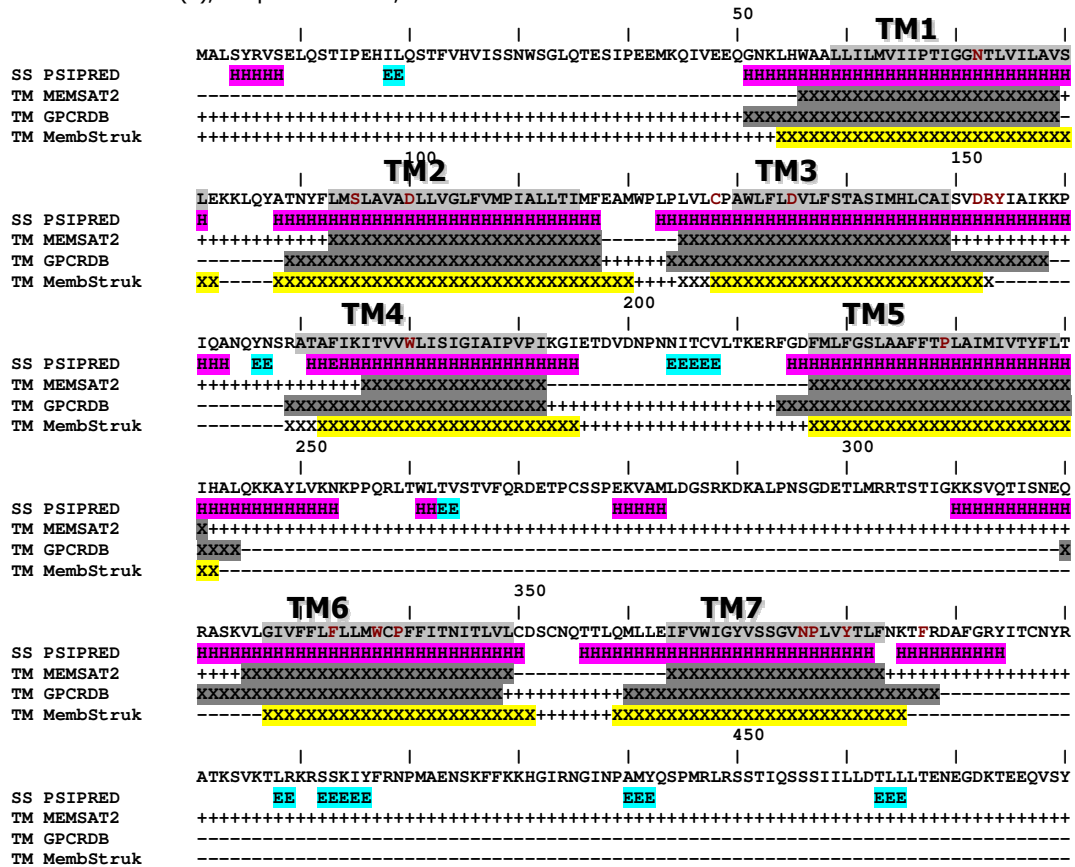

Fig. S2. The prediction of secondary structure for the human 5-HT2B receptor.

TM1      LHWAALLILMVIIPTIGGNTLVILAVSLE (29) 13.67  
 TM2      TNYFLMSLAVADLLVGLFVMPIALLLTIMFEAM (32) 13.67  
 TM3      LVLCPAWLFLDVLFSTASIMHLCAISVDRYIAIK (34) 15.33  
 TM4      RATAFIKITVWLISIGIAIPVPIKG (26) 14.67  
 TM5      FGDFMLFGSLAAFFTPLAIMIVTYFLTIH (29) 14.67  
 TM6      EQRASKVLGIVFFLFLLMWCPFFITNITLVLCD (33) 19.33  
 TM7      QMLLEIFVWIGYVSSGVNPLVYTLFNK (27) 14.67

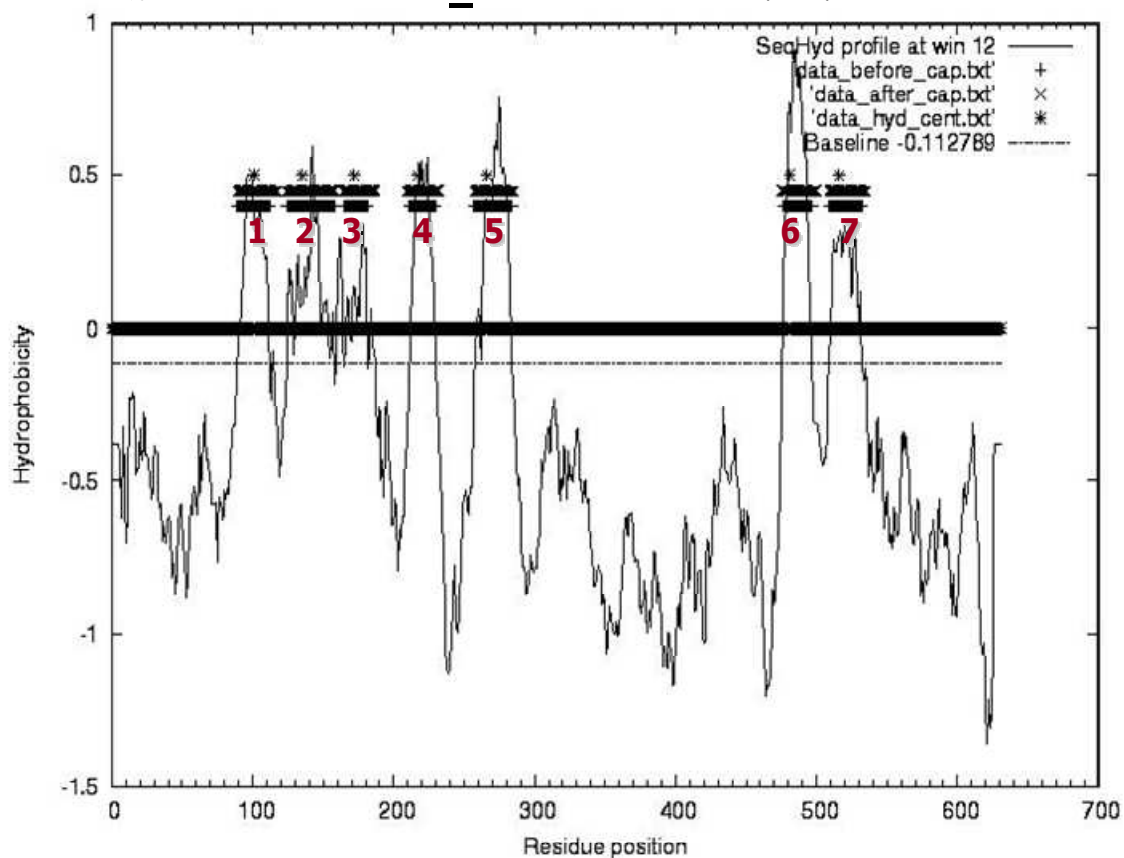

**Fig. S3.** The sequence of seven transmembrane (TM) regions (Top) and its hydropathy plot (Bottom) of human 5-HT<sub>2B</sub> receptor predicted by TMpred program. Hydrophobic centers by the peak method in underline were calculated. Highly conserved residues in each TM were shown in red.

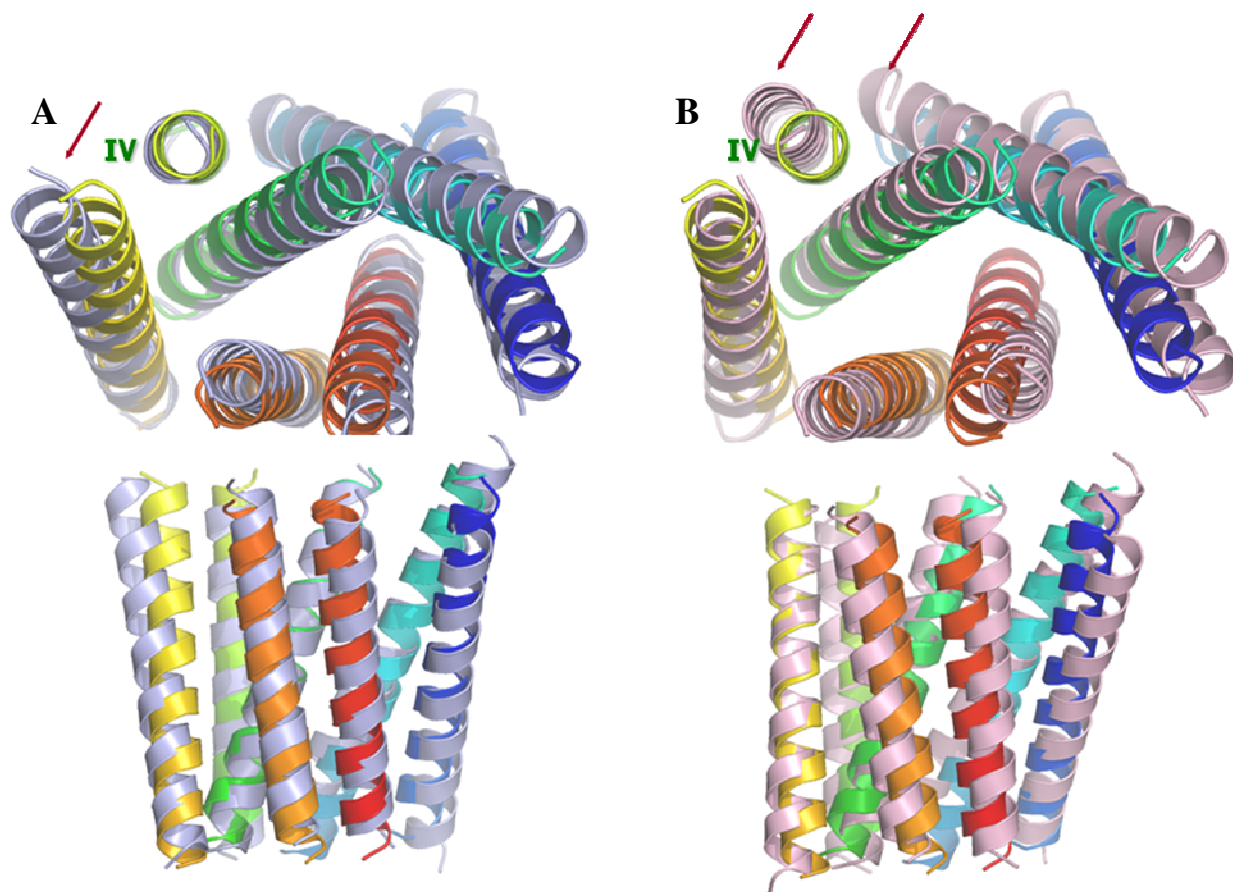

**Fig. S4.** Superimposition of two different templates with the frog rhodopsin<sup>19</sup> template in seven different colors (TM1: blue, TM2: cyan, TM3: green, TM4: light green, TM5: yellow, TM6: orange, TM7: red). The seven helices of human 5-HT2B receptor were generated using different templates of (A) mouse Mas-related gene (Mrg) C11 (mMrgC11)<sup>19</sup> in light blue and (B) human CCR1 (hCCR1) Chemokine receptor<sup>20</sup> in pink. Compared to the structure generated by the frog rhodopsin template, the RMSD of the 5-HT2B structure generated by mMrgC11 and hCCR1 receptor templates showed 3.44 and 3.98 Å, respectively. Major structural deviations are shown by arrows.

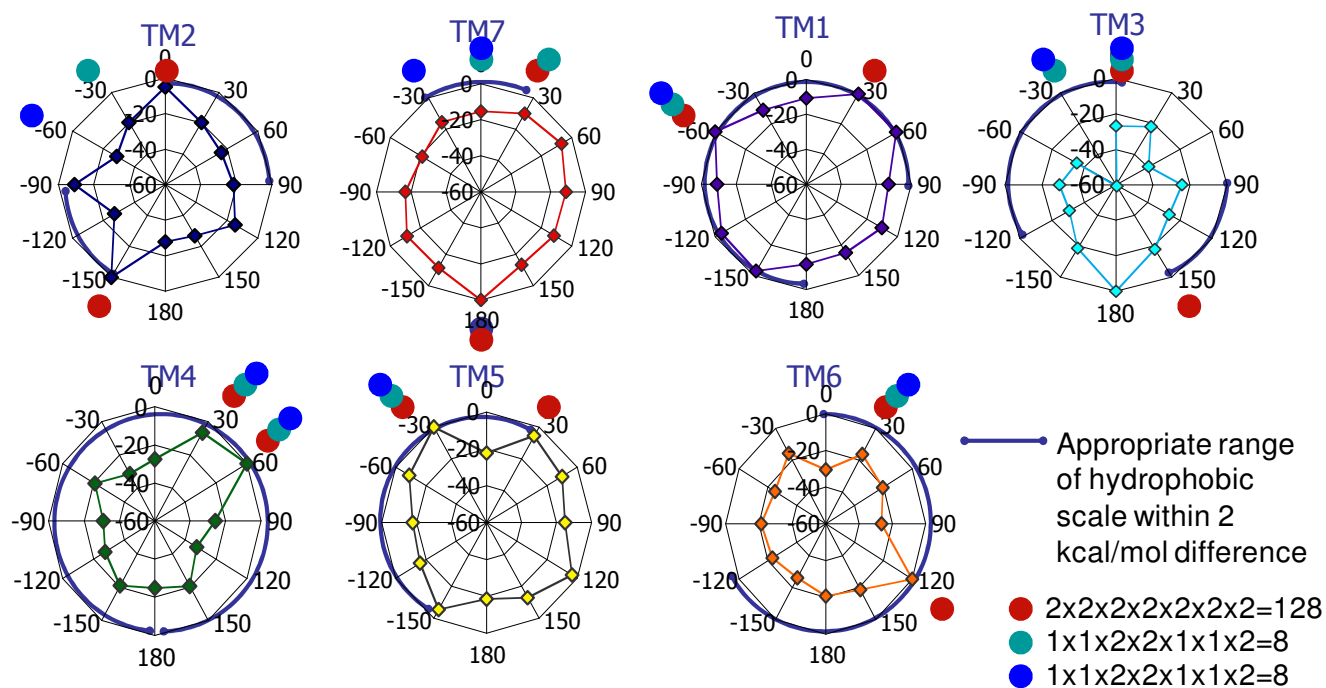

**Fig. S5.** Interhelical interaction energies of MembScream. E-scream energy of each transmembrane (TM) was calculated and plotted radially outward in kcal/mol. In the plot of Scream E, 0 is the lowest Scream E, and others are the relative energy compared with the lowest one. Energetically preferred angles of the hHT2B receptor at each TM were shown in red, green and blue at the first, second and third round, respectively. Those angles were considered within 2 kcal/mol relative energy differences of hydrophobic penalty.

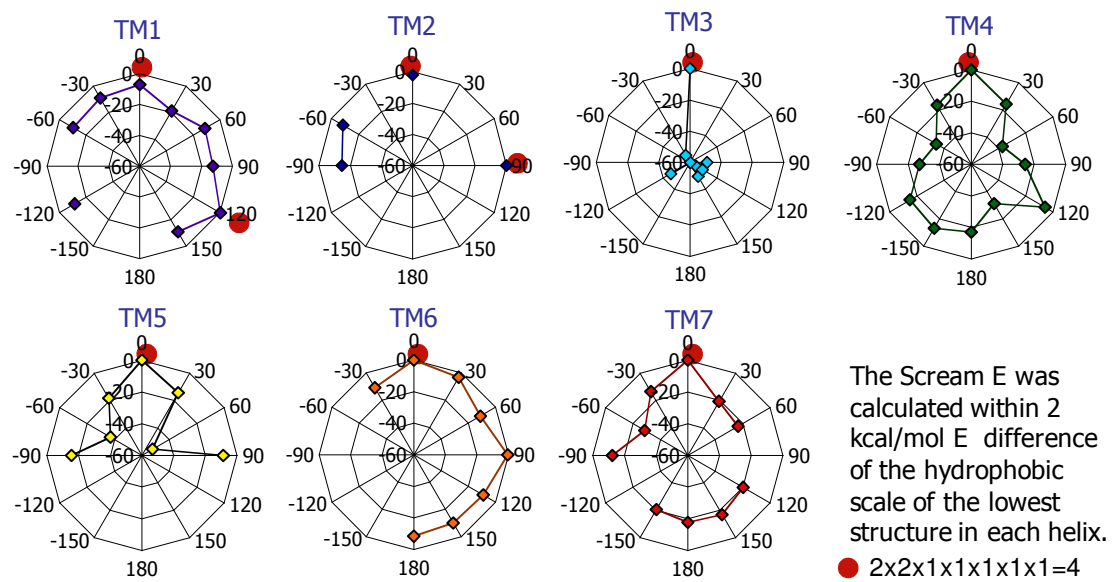

**Fig. S6.** Interhelical interaction energies of MembScream at the third round.

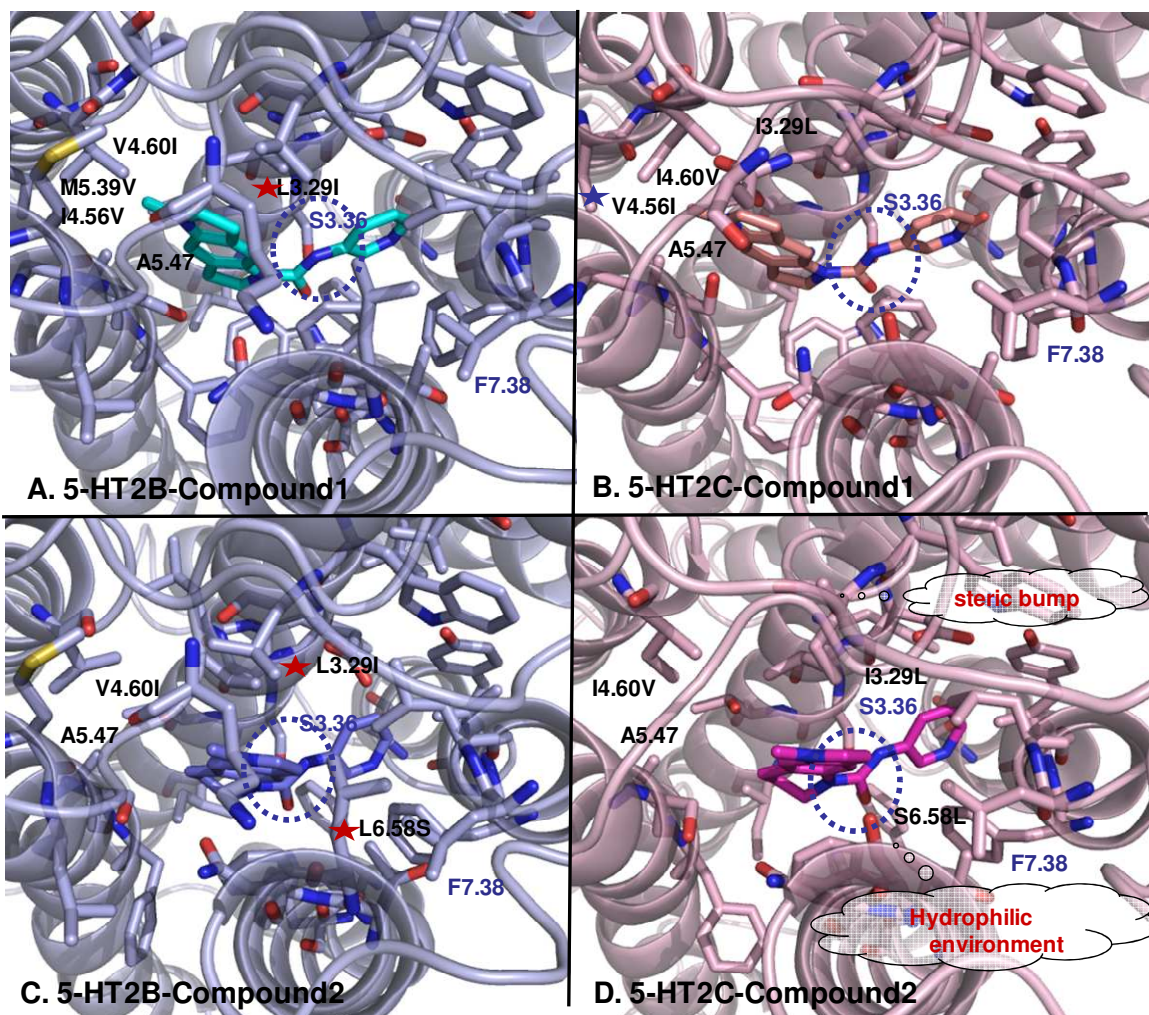

**Fig. S7.** The complexes of the nonselective 5-HT2B/2C receptor antagonist (SB-206533 **1**) and the selective 5-HT2B receptor antagonist (**2**) at the human 5-HT2B and 2C receptors. A) 5-HT2B/ SB-206533 **1**, B) 5-HT2C/ SB-206533 **1**, C) 5-HT2B/ **2**, and D) 5-HT2C/ **2**. The reduced interaction of **2** at the 5-HT2C receptors is predicted. Terminal methyl group has unfavorable van der Waals (vdW) interactions with I132 (3.29) at the 5-HT2C receptor, compared with the favorable vdW interaction of L132 (3.29) at the 5-HT2B receptor, leading to +8.46 kcal/mol differential binding at the 5-HT2C receptor.

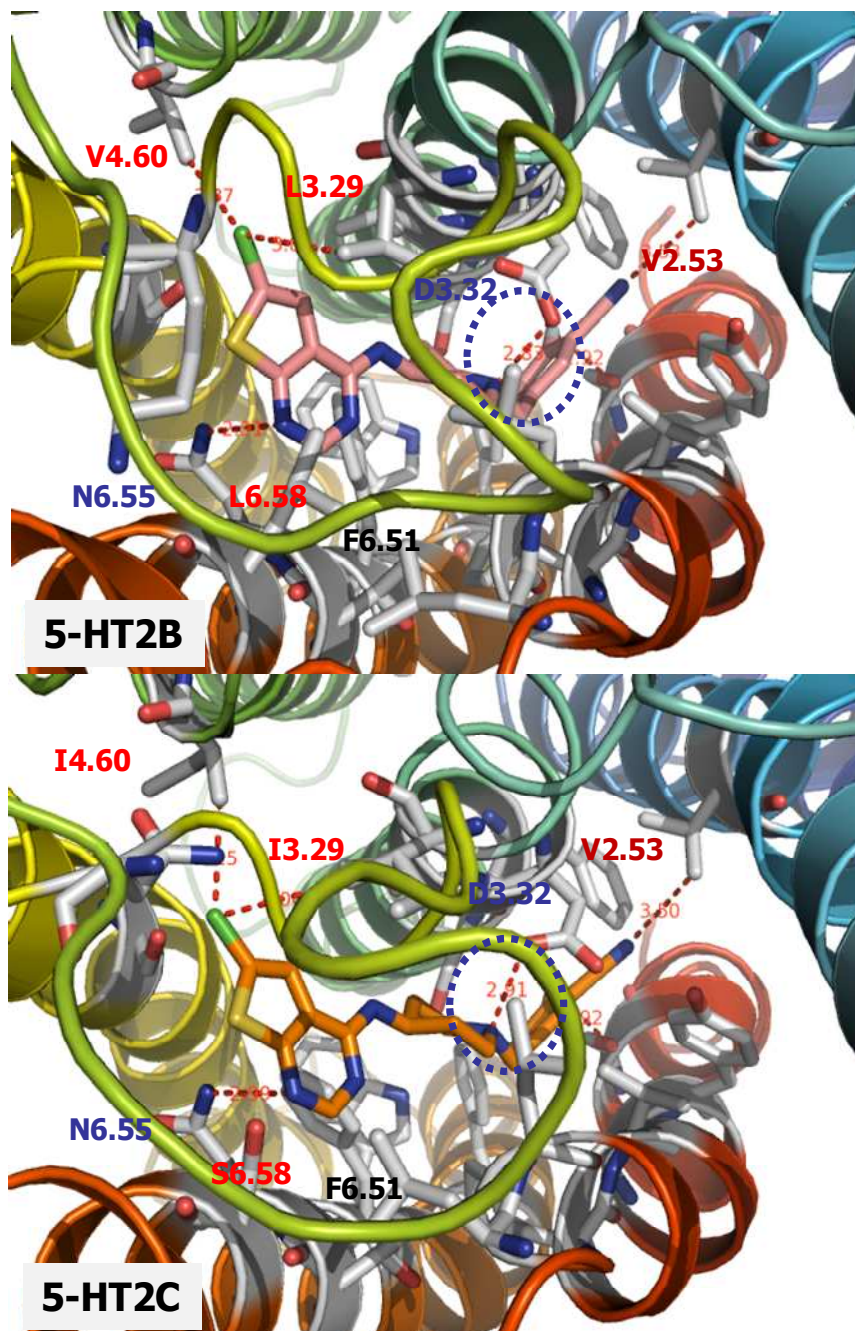

**Fig. S8.** The binding mode of highly selective 5-HT2B receptor antagonist PRX-08066 **3** at the human 5-HT2B (top) and 2C (bottom) receptors. Salt-bridge interactions in circle were shown at conserved D3.32 with protonated nitrogen in pyridine ring. H-bondings were displayed dotted red line with their distances.



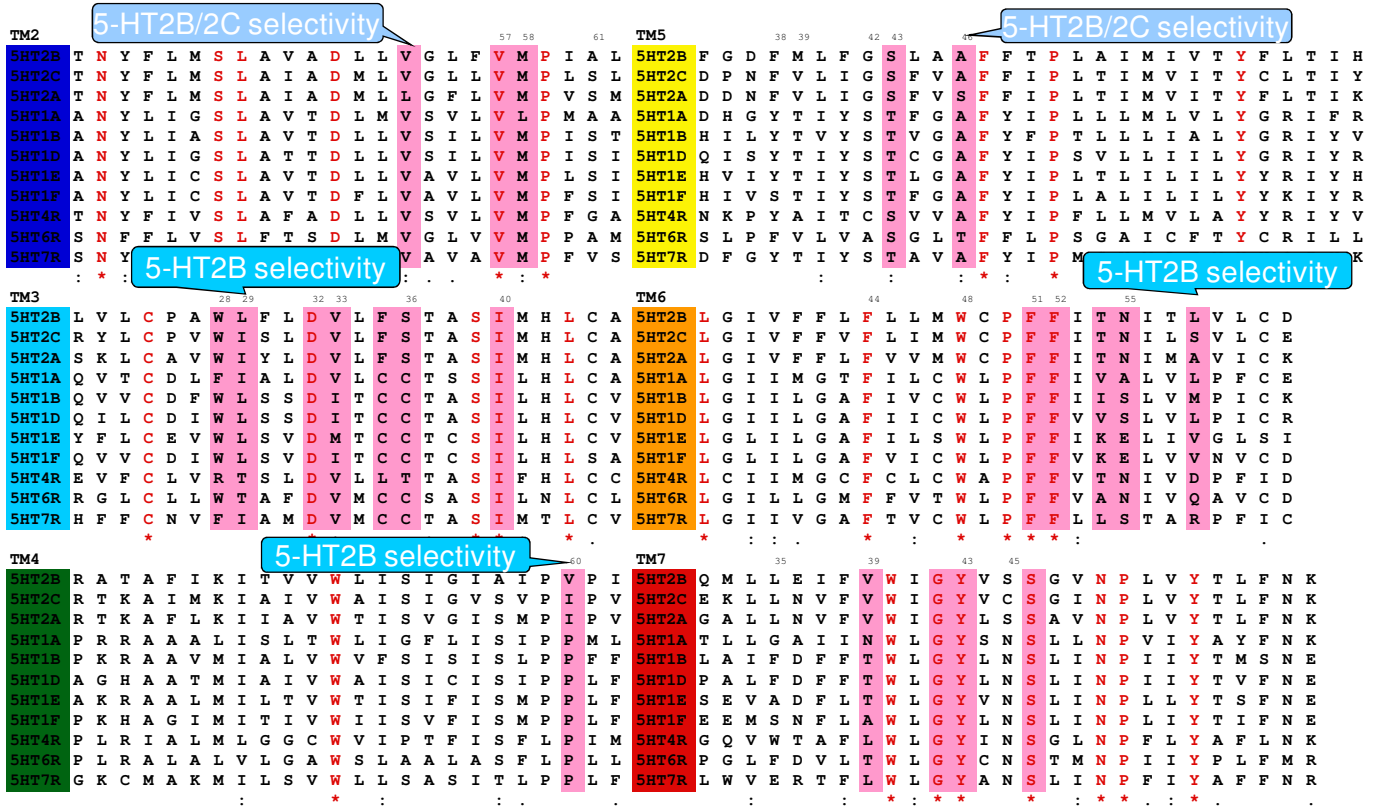

Fig. S9. Multiple alignments of 11 serotonin receptors.

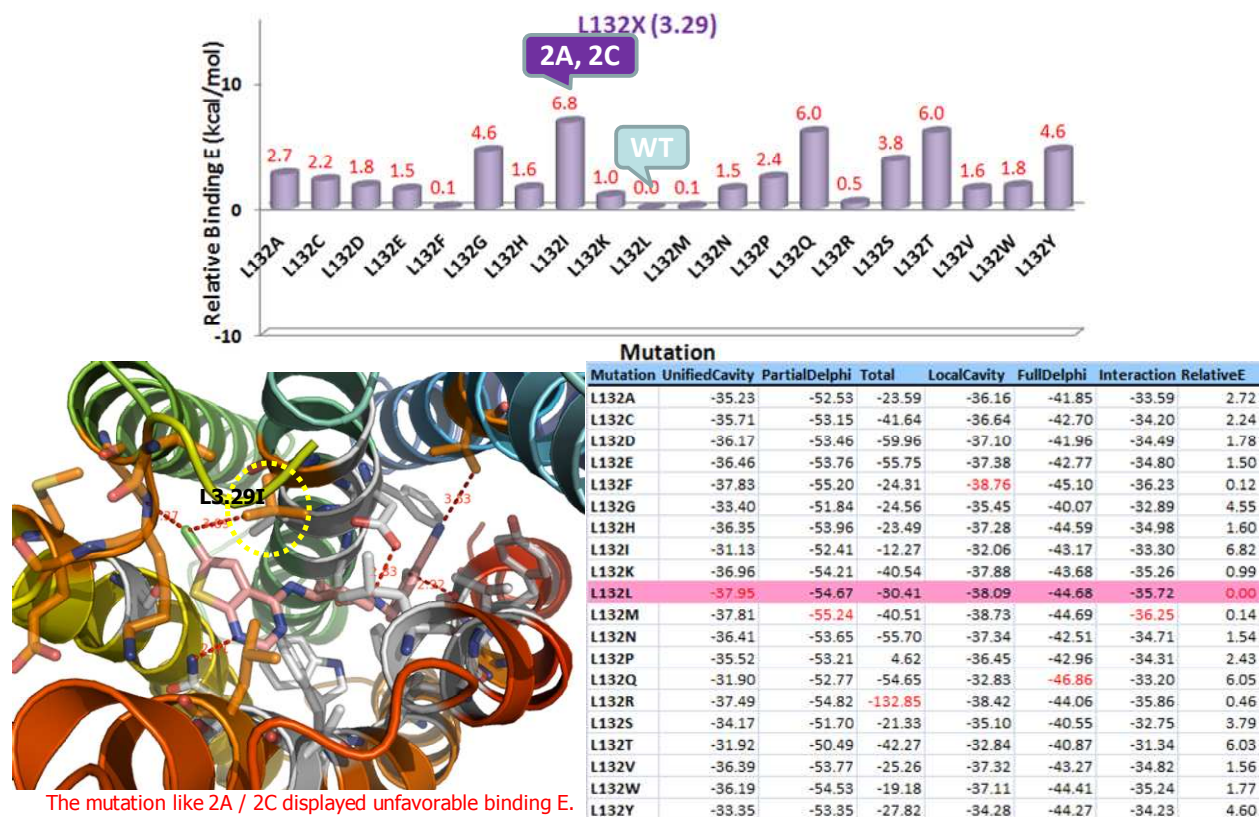

**Fig. S10.** The mutation study of subtype selective residue L132X (3.29) from the cavity analysis of the complex of PRX-08066 **3**/ 5-HT<sub>2B</sub> receptor in neutral system
